# Supplementary material
Source: Springer Nature journal article supplement (https://www.springermedizin.de/resource/supplementary/12990_2010_301_MOESM1_ESM.pdf/9612984)

**a**

ACC lesion sites

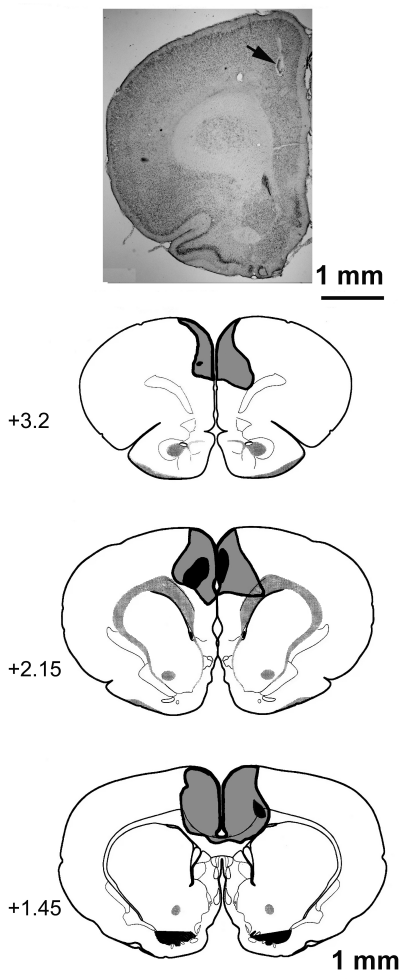**b**

Short retention test

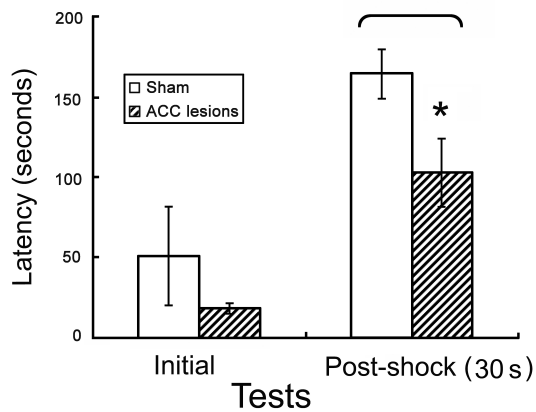**c**

Long retention test

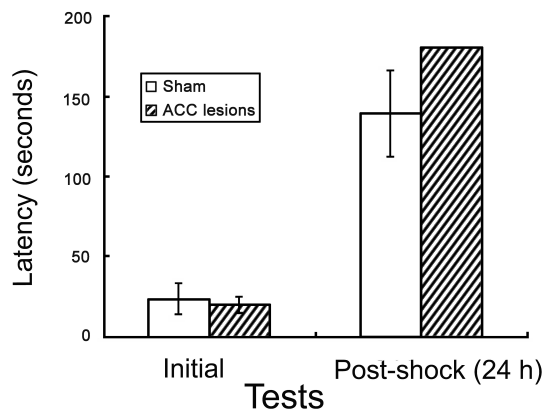

Supplement: MOESM1 [file 9612984]
